# Supplementary material for: Association between Glomerular Filtration Rate and β-Thalassemia Major: A Systematic Review and Meta-Analysis
Source: MDPI journal article supplement (doi:10.3390/thalassrep13030018), 2023-08-29
Supplement: s1 [file s1]

Supplementary table S1: Search strategy

| <b>Databases</b> | <b>Search strategy</b>                                                                                                                                                                                                                  |
|------------------|-----------------------------------------------------------------------------------------------------------------------------------------------------------------------------------------------------------------------------------------|
| Google Scholar   | allintitle: glomerular thalassemia                                                                                                                                                                                                      |
| PubMed           | (((glomerular[Title/Abstract]) OR (gfr[Title/Abstract])) AND (Thalassemia[Title/Abstract])) AND (((randomized control trial[Title/Abstract]) OR (rct[Title/Abstract])) OR (case control[Title/Abstract])) OR (healthy[Title/Abstract])) |
| ScienceDirect    | Title, abstract, keywords: glomerular thalassemia                                                                                                                                                                                       |
